# Supplementary material
Source: PubMed Central journal article supplement (PMC3103330)
Supplement: supp_M111.221739_Patterson.pdf [file supp_M111.221739_Patterson.pdf]

**SUPPLEMENTARY TABLES**

**METABOLOMICS REVEALS ATTENUATION OF THE SLC6A20 KIDNEY TRANSPORTER  
IN NONHUMAN PRIMATE AND MOUSE MODELS OF TYPE 2 DIABETES MELLITUS**

Andrew D. Patterson, Jessica A. Bonzo, Fei Li, Kristopher W. Krausz, Gabriel S. Eichler, Sadaf Aslam,  
Xenia Tigno, John N. Weinstein, Barbara C. Hansen<sup>3</sup>, Jeffrey R. Idle<sup>5</sup>, and Frank J. Gonzalez

| <b>Supplementary Table 1. QPCR Primer Sequences</b> |                          |                |
|-----------------------------------------------------|--------------------------|----------------|
| <b>QPCR Primer</b>                                  | <b>Sequence (5'-3')</b>  | <b>Species</b> |
| SLC6A20 - FWD                                       | CCATCCTTACCCCTCTGACA     | Rhesus         |
| SLC6A20 - REV                                       | CACAGTTGACAAGGCACACC     | Rhesus         |
| SLC36A1 - FWD                                       | CATGGTCATTGTCACCATCC     | Rhesus         |
| SLC36A1 - REV                                       | GTAGAACTGGAGCGCGTAGG     | Rhesus         |
| HNF1 $\alpha$ - FWD                                 | GCTGTACCAGAGCTCAGACTCC   | Rhesus         |
| HNF1 $\alpha$ - REV                                 | CATCTGCGTGGAGATGAAGG     | Rhesus         |
| COLLECTRIN/TMEM27 - FWD                             | CTGAAGTGGATGACGCTGAA     | Rhesus         |
| COLLECTRIN/TMEM27 - REV                             | CATCATTAAATGTGCCCTCCC    | Rhesus         |
| $\beta$ -ACTIN - FWD                                | CCATCATGAAGTGTGACGTGG    | Rhesus         |
| $\beta$ -ACTIN - REV                                | TTCTGCATCCTGTCAGCAATG    | Rhesus         |
| Slc6a20a - FWD                                      | GATGATGTAGGGGACCAGGA     | Mouse          |
| Slc6a20a - REV                                      | ATCCGCTGCAGTTCGTGT       | Mouse          |
| Slc6a20b - FWD                                      | GATGATGTAGGGGACCAGGA     | Mouse          |
| Slc6a20b - REV                                      | ATCTCCTATGCTGTGGGCCT     | Mouse          |
| Slc36a1 - FWD                                       | CTTCGTTCCGAAGCCTCTGT     | Mouse          |
| Slc36a1 - REV                                       | AGGTGGGCTGAGCAGGAG       | Mouse          |
| Hnf1 $\alpha$ - FWD                                 | GACTTGACCATCTTCGCCAC     | Mouse          |
| Hnf1 $\alpha$ - REV                                 | CTGAAAGAGCCGGAGAACCT     | Mouse          |
| Hnf1 $\beta$ - FWD                                  | ACCATGGTGACTGATTGTCG     | Mouse          |
| Hnf1 $\beta$ - REV                                  | TCCTCTCCACCCAACAAGAT     | Mouse          |
| Slc5a2 - FWD                                        | AAGATGCACCCAGCTTTGAT     | Mouse          |
| Slc5a2 - REV                                        | CATTGTCTCGGGCTGGTATT     | Mouse          |
| $\beta$ -Actin- FWD                                 | TATTGGCAACGAGCGGTTCC     | Mouse          |
| $\beta$ -Actin- REV                                 | GGCATAGAGGTCTTTACGGATGTC | Mouse          |

**Supplementary Table 2. Metabolomics Cohort – Demographics and Clinical Chemistry.**

| Monkey ID | Metabolic Status | Age (years) <sup>†</sup> | Body Weight (kg) <sup>#</sup> | Fasting Plasma Glucose (mmol/l) <sup>‡</sup> | Serum Triglycerides (mmol/l) <sup>‡</sup> | HbA1c (%) <sup>‡</sup> | Plasma Insulin (pmol/l) <sup>§</sup> |
|-----------|------------------|--------------------------|-------------------------------|----------------------------------------------|-------------------------------------------|------------------------|--------------------------------------|
| C11       | N                | 16                       | 12.0                          | 3.6                                          | 1.1                                       | 3.9                    | 174                                  |
| C07       | N                | 27                       | 10.8                          | 4.4                                          | 0.7                                       | 4.4                    | 257                                  |
| D12       | N                | 10                       | 16.3                          | 3.1                                          | 0.5                                       | 4.3                    | 263                                  |
| E12       | N                | 6                        | 7.5                           | 3.2                                          | 0.5                                       | 4.2                    | 93                                   |
| F12       | N                | 8                        | 10.6                          | 2.9                                          | 0.8                                       | 4                      | 160                                  |
| F13       | N                | 14                       | 9.7                           | 2.9                                          | 0.4                                       | 3.8                    | 194                                  |
| G14       | N                | 20                       | 20.9                          | 2.8                                          | 0.5                                       | 4.5                    | 472                                  |
| G11       | N                | 16                       | 9.5                           | 3.3                                          | 0.8                                       | 4.2                    | 149                                  |
| T13       | N                | 11                       | 9.4                           | 3.7                                          | 0.7                                       | 3.8                    | 188                                  |
| Y10       | N                | 15                       | 14.5                          | 3.4                                          | 1.3                                       | 4.4                    | 444                                  |
| B10       | T2DM             | 18                       | 19.0                          | 10.3                                         | 5.8                                       | 10.1                   | 826                                  |
| D10*      | T2DM             | 18                       | 20.5                          | 7.4                                          | 11.0                                      | 9.9                    | 1241                                 |
| F11       | T2DM             | 16                       | 14.4                          | 12.7                                         | 20.1                                      | 11                     | 353                                  |
| J09       | T2DM             | 29                       | 10.9                          | 13.6                                         | 5.5                                       | 7.9                    | 155                                  |
| K12       | T2DM             | 25                       | 11.1                          | 10.6                                         | 20.6                                      | 8.3                    | 252                                  |
| P11       | T2DM             | 21                       | 18.8                          | 8.7                                          | 2.5                                       | 10.0                   | 892                                  |
| S08       | T2DM             | 18                       | 15.6                          | 8.4                                          | 7.3                                       | 10.1                   | 628                                  |
| T11       | T2DM             | 24                       | 16.2                          | 6.6                                          | 2.9                                       | 9.6                    | 3203                                 |
| U11       | T2DM             | 20                       | 16.2                          | 9.6                                          | 19.6                                      | 9.9                    | 240                                  |
| V10       | T2DM             | 24                       | 15.4                          | 11.5                                         | 4.0                                       | 10.2                   | 875                                  |
| W10       | T2DM             | 19                       | 15.2                          | 12.9                                         | 7.9                                       | 10.1                   | 301                                  |

<sup>#</sup>p<0.05, <sup>†</sup>p<0.01 using unpaired t test

<sup>§</sup>p<0.01, <sup>‡</sup>p<0.001 using Mann-Whitney U test

\*Never received insulin

**Supplementary Table 3. Biochemistry Cohort – Demographics and Clinical Chemistry at Death.**

| <b>Monkey ID</b> | <b>Metabolic Status</b> | <b>Age (years)</b> | <b>Body Weight (kg)</b> | <b>Fasting Plasma Glucose (mmol/l) #</b> | <b>Serum Triglycerides (mmol/l) #</b> | <b>HbA1c (%)#</b> | <b>Plasma Insulin (pmol/l)</b> |
|------------------|-------------------------|--------------------|-------------------------|------------------------------------------|---------------------------------------|-------------------|--------------------------------|
| I10              | N                       | 18.9               | 9.8                     | 4.8                                      | 1.1                                   | 4.8               | 188                            |
| C11              | N                       | 16.5               | 12.3                    | 3.1                                      | 0.6                                   | 4.2               | 257                            |
| Z08              | N                       | 27.8               | 27.2                    | 3.9                                      | 0.7                                   | 4.5               | 403                            |
| S09              | N                       | 30.6               | 7.1                     | 4.5                                      | 1.9                                   | 4.3               | 403                            |
| L11              | N                       | 28.7               | 8.0                     | 3.0                                      | 0.6                                   | 4.4               | 208                            |
| Q12              | N                       | 18.7               | 10.4                    | 3.8                                      | 0.3                                   | 3.8               | 264                            |
| J06              | N                       | 29.7               | 8.2                     | 3.8                                      | 2.3                                   | na                | 378                            |
| Y07              | N                       | 14.0               | 9.5                     | 3.7                                      | 0.5                                   | 4.0               | 162                            |
| J11              | N                       | 26.4               | 8.7                     | 4.7                                      | 2.5                                   | 4.4               | 278                            |
| G10              | T2DM                    | 23.0               | 14.9                    | 15.3                                     | 2.8                                   | 8.2               | 35                             |
| X05              | T2DM                    | 29.9               | 11.3                    | 12.2                                     | 2.1                                   | na                | 180                            |
| W04              | T2DM                    | 24.3               | 11.1                    | 19.6                                     | 22.7                                  | 8.1               | 250                            |
| S08              | T2DM                    | 19.2               | 13.8                    | 9.1                                      | 1.5                                   | 10.8              | 458                            |
| S10              | T2DM                    | 21.9               | 17.5                    | 15.1                                     | 5.9                                   | 11.0              | 306                            |
| A10              | T2DM                    | 18.9               | 14.2                    | 17.7                                     | 9.9                                   | 10.4              | 222                            |

#p<0.01 using Mann-Whitney U test; na, measurement not available
